# Supplementary material for: American Gut: an Open Platform for Citizen Science Microbiome Research
Source: PubMed Central journal article supplement (PMC5954204; doi:10.1128/msystems.00031-18), 2018-05-15

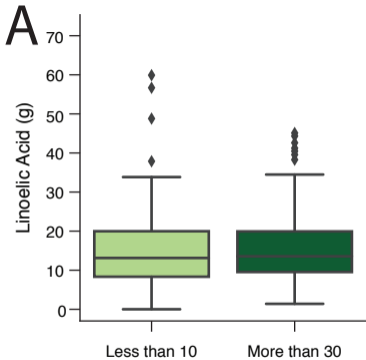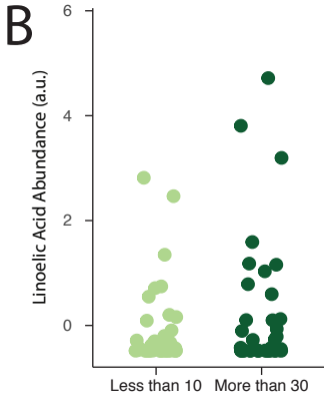

Supplement: sys003182229sf3.pdf [file sys003182229sf3.pdf]
