# Supplementary material for: American Gut: an Open Platform for Citizen Science Microbiome Research
Source: PubMed Central journal article supplement (PMC5954204; doi:10.1128/msystems.00031-18), 2018-05-15

**A** m/z 415.353  
Proposed structure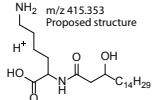**D** m/z 413.337  
Proposed structure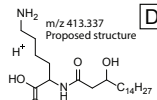**G** m/z 611.536  
Compound 2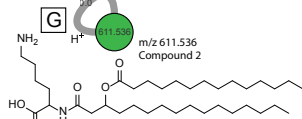**B** m/z 387.322  
Compound 4b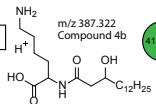**E** m/z 359.290  
Proposed structure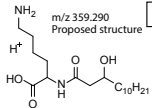**H** m/z 330.264  
Compound 1  
Commendamide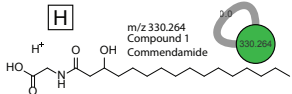**C** m/z 401.338  
Proposed structure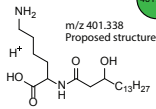**F** m/z 373.306  
Proposed structure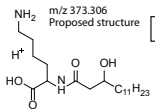**I** m/z 344.280  
Proposed structure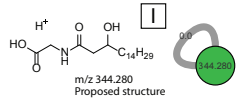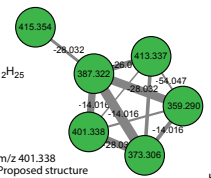

## MS/MS matching for compound 2

**J**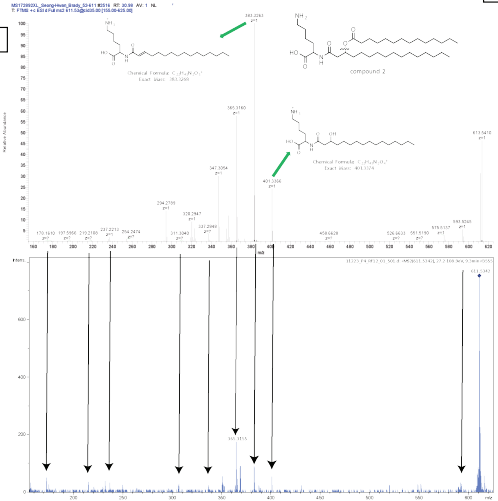**K**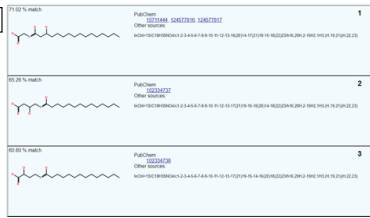**L** 115.09  
Chemical Formula:  $C_{21}H_{42}N_2O_4^+$   
Exact Mass: 387.3217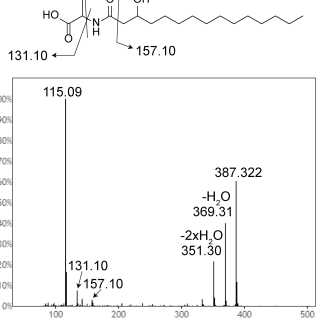

Supplement: sys003182229sf4.pdf [file sys003182229sf4.pdf]
